# Supplementary figures and images for: Application of Virtual Surgical Planning to Reduction Mandibuloplasty for Mandibular Hyperplasia Secondary to Acromegaly
Source: PubMed Central journal article supplement — Plast Reconstr Surg Glob Open. 2022 Apr 22;10(4):e4173. doi: 10.1097/GOX.0000000000004173 (PMC9029986; doi:10.1097/gox.0000000000004173), 2022-04-22

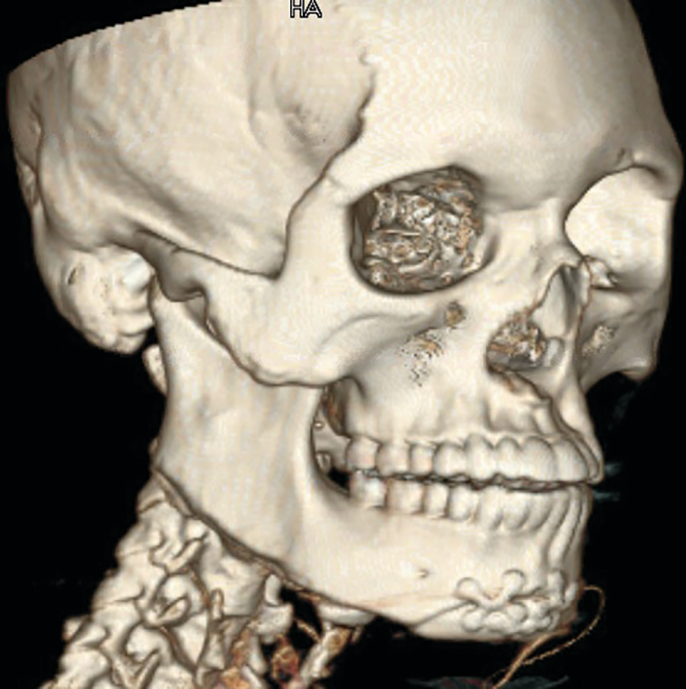

Supplement: gox-10-e4173-s001.pdf [file gox-10-e4173-s001.pdf]
